# Supplementary material for: Polyploidy of Endosymbiotically Derived Genomes in Complex Algae
Source: PubMed Central journal article supplement (PMC4007541; doi:10.1093/gbe/evu071), 2014-04-07
Supplement: supp_evu071_Supplemetal_data.pdf [file supp_evu071_Supplemetal_data.pdf]

Figure S1

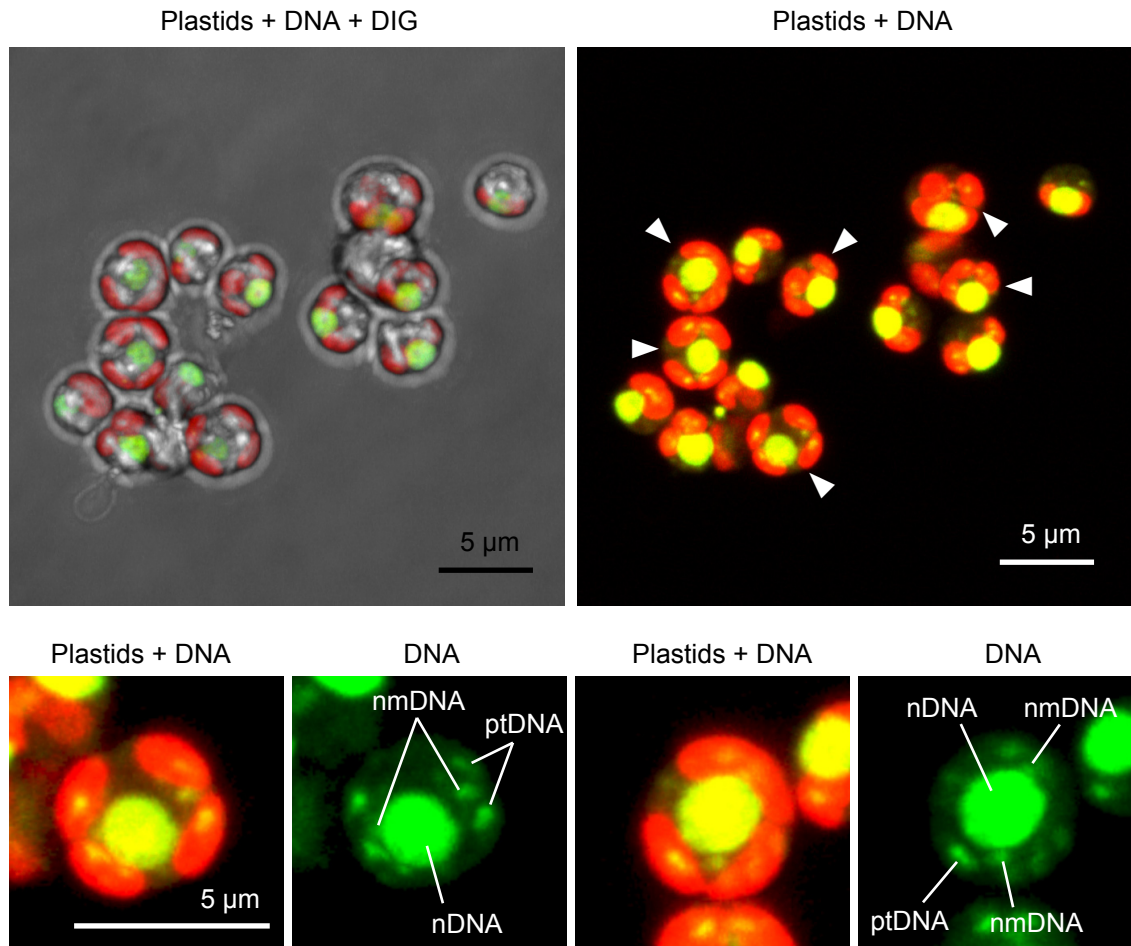

Figure S1. Three-dimensional images of plastid and DNA localization in *Bigeloviella natans* cells. The images were reconstructed from 17 scanning images obtained by a confocal laser microscope (Zeiss LSM 510). Red chlorophyll autofluorescence corresponds to plastids, and green/yellow fluorescence is showing DNA localization stained by SYBR Green. White arrow heads indicate the cells possessing divided plastids. nmDNA, nucleomorph DNA; ptDNA, plastid DNA; nDNA, nuclear DNA.

Table S1. Quantitative PCR primers for ribosomal protein genes of *Bigeloviella natans* and *Guillardia theta*

| <b>Organism</b>  | <b>Target genome</b> | <b>Gene</b> | <b>Forward primer</b>     | <b>Reverse primer</b>    |
|------------------|----------------------|-------------|---------------------------|--------------------------|
| <i>B. natans</i> | Nuclear              | rpL4        | GAACATTCCTGGCGTTGAGG      | CGCTTAGTGGAACCCAGATAG    |
|                  | Nuclear              | rpL8        | CCGCAACCCGTACAAATACAAG    | GCATAGCCGAAAGAGGAAGAAC   |
|                  | Nucleomorph          | rpL4        | ATAACTCTGGGAATCAAGTTTCAGC | TTTTCGTGTACCTGATCCCTTATC |
|                  | Nucleomorph          | rpL8        | GCCTTTGTCGGTGTCTTTTCTC    | TACTTACCGCCACCTGCTACAAC  |
|                  | Mitochondrial        | rpL5        | AGGGCCTTTGATACAGGAATTTTAG | TCCAAGCGCATAGGCAAAC      |
|                  | Mitochondrial        | rpL16       | TTAGTGGCCTAGAAGACAAAGCTG  | GCTCATCGTAAACAAAAGTGGTG  |
|                  | Plastid              | rpL5        | ATTTAGCTCTGCCAAGAGTACGTG  | GACCCAACTAAAGTTACCACAACC |
|                  | Plastid              | rpL16       | ACCTATTACTTTCCGTCCACCAG   | GATCTGACAACTGAAACCCAAAG  |
| <i>G. theta</i>  | Nuclear              | rpL8        | GTCGTGGTGCTGGTTCTGTC      | CCATTCCTCTCAGCAAAGTCC    |
|                  | Nuclear              | rpL15       | CAACGATCCTCGCCTCAAC       | ACCTGTGATTGCCGTGTCC      |
|                  | Nucleomorph          | rpL8        | TCATCAACATATCGGTCATCCTTC  | GGTTCGTCTTGCTCCTATTAACC  |
|                  | Nucleomorph          | rpL15       | AAAACCCACTAGACCAGAGAAAGC  | ATGACTCTTAGGCTTACCCGTTG  |
|                  | Plastid              | rpL5        | AAATTAGAGAAGGTATGCCTGTTGG | CGAATACGCGGTAAAGAAAGATG  |
|                  | Plastid              | rpL16       | TAAACGAGTTGGTCGATTGTGG    | GCTCCATTCCTGTTTCTGGTG    |
